# Supplementary material for: Evaluating Rhizobacterial Antagonists for Controlling Cercospora beticola and Promoting Growth in Beta vulgaris
Source: MDPI journal article supplement (doi:10.3390/microorganisms12040668), 2024-03-27
Supplement: s1 [file s1]

**Supplementary Information (8 pages):**

- **Five supplementary tables**
- **Four supplementary figures**
- **References of Tables S1 and S2**

**Table S1.** Oligonucleotide sequences (in the 5' to 3' direction) were employed for the amplification of genes encoding lipopeptides from the DNA of bacterial isolates.

| <b>Lipopeptides</b> | <b>Primers</b>   | <b>Primer sequences</b>                                           | <b>PCP length (bp)</b> | <b>Annealing T°</b> | <b>References</b> |
|---------------------|------------------|-------------------------------------------------------------------|------------------------|---------------------|-------------------|
| Bacillomycin        | Bacc1F<br>Bacc1R | GAAGGACACGGCAGAGAGTC<br>CGCTGATGACTGTTTCATGCT                     | 875                    | 60 °C               | [1]               |
| Fengycin            | Fend1F<br>Fend1R | TTTGGCAGCAGGAGAAGTT<br>GCTGTCCGTTCTGCTTTTTC                       | 964                    | 62 °C               | [1]               |
| Iturin              | Itup1F<br>Ituo2R | AGCTTAGGGAACAATTGTCATCGGGGCTTC<br>TCAGATAGGCCGCCATATCGGAATGATTTCG | 2000                   | 45 °C               | [2]               |
| Surfactin           | P17<br>P18       | ATGAAGATTTACGGAATTTA<br>TTATAAAAGCTCTTCGTACG                      | 675                    | 53 °C               | [3]               |

**Table S2.** Diverse biochemical analyses were performed, encompassing both the aspect of revelation and the evaluation of activity indices.

| Biochemical test         | Media reference | Revelation aspect                                 | Activity index evaluation                                  | Activity index evaluation reference |
|--------------------------|-----------------|---------------------------------------------------|------------------------------------------------------------|-------------------------------------|
| Cellulase                | [4]             | clear circular area around the bacteria colony    | (Clear zone+ colony diameter (mm)/colony diameter (mm))    | [5]                                 |
| Pectinase                | [6]             | clear circular area around the bacteria colony    | (Clear zone+ colony diameter (mm)/colony diameter (mm))    | [5]                                 |
| Amylase                  | [7]             | clear circular area around the bacteria colony    | (Clear zone+ colony diameter (mm)/colony diameter (mm))    | [8]                                 |
| Protease                 | [4]             | clear circular area around the bacteria colony    | (Clear zone+ colony diameter (mm)/colony diameter (mm))    | [9]                                 |
| Chitinase                | [10]            | clear circular area around the bacteria colony    | (Clear zone+ colony diameter (mm)/colony diameter (mm))    | [5]                                 |
| Phosphate solubilisation | [5]             | clear circular area around the bacteria colony    | (Clear zone+ colony diameter (mm)/colony diameter (mm))    | [11]                                |
| HCN                      | [12]            | change of coloration from yellow to reddish-brown | (-) negative; light brown (+); brown (++) dark brown (+++) | [13]                                |
| AIA                      | [14]            | change of coloration from yellow to red           | (-) negative; light red (+); red (++) - dark red (+++)     | -                                   |

**Table S3.** Application of treatments with varying concentrations against *C. beticola* in the field experiment.

| Treatments              | Active ingredient   | Concentration g/(l-kg)   | Active ingredient/ha   | Code    |
|-------------------------|---------------------|--------------------------|------------------------|---------|
| SCORE 250 EC (SYNGENTA) | Difenoconazole      | 250                      | 125                    | DF      |
| BGH 1-6                 | <i>Pantoea sp.</i>  | 1x10 <sup>8</sup> CFU/ml | 4x10 <sup>12</sup> CFU | BGH 1-6 |
| BGH 2-2                 | <i>Serratia sp.</i> | 1x10 <sup>8</sup> CFU/ml | 4x10 <sup>12</sup> CFU | BGH 2-2 |
| BGH 1-3                 | <i>Serratia sp.</i> | 1x10 <sup>8</sup> CFU/ml | 4x10 <sup>12</sup> CFU | BGH 1-3 |
| BGH 2-7                 | <i>Bacillus sp.</i> | 1x10 <sup>8</sup> CFU/ml | 4x10 <sup>12</sup> CFU | BGH 2-7 |
| untreated control       |                     |                          |                        | UC      |

**Table S4.** The impact of bacterial inoculation on the growth of sugar beet plants in a greenhouse experiment.

| Bacterial isolates | Root dry weight <sup>a</sup> (g) | Shoot dry weight <sup>a</sup> (g) | Root length <sup>a</sup> (mm) | shoot length <sup>a</sup> (mm) | Gain of root lenght (%) | Gain of shoot length <sup>b</sup> (%) | Gain of Shoot dry weight <sup>b</sup> (%) | Gain of root dry weight <sup>b</sup> (%) | Total gain of root dry weight <sup>b</sup> (%) | Root hair development <sup>c</sup> |
|--------------------|----------------------------------|-----------------------------------|-------------------------------|--------------------------------|-------------------------|---------------------------------------|-------------------------------------------|------------------------------------------|------------------------------------------------|------------------------------------|
| <b>BGH 1-5</b>     | 1.09±0.04                        | 1.70±0.02                         | 44.13±1.79                    | 22.28±0.30                     | 72.70%                  | 389%                                  | 78%                                       | 107%                                     | 86%                                            | +                                  |
| <b>G1b</b>         | 1.22±0.02                        | 1.49±0.03                         | 31.13±1.26                    | 18.74±0.65                     | 45.30%                  | 245%                                  | 56%                                       | 131%                                     | 81%                                            | ++                                 |
| <b>BGH 2-1</b>     | 1.06±0.072                       | 1.62±0.10                         | 38.12±4.93                    | 21.81±0.80                     | 69.10%                  | 322%                                  | 70%                                       | 101%                                     | 79%                                            | +                                  |
| <b>BGH 4-1</b>     | 0.93±0.07                        | 1.72±0.02                         | 17.68±0.42                    | 23.01±0.40                     | 78.40%                  | 96%                                   | 80.50%                                    | 77%                                      | 77%                                            | ++                                 |
| <b>BGH 1-6</b>     | 1.15±0.17                        | 1.44±0.13                         | 25.12±9.46                    | 18.58±2.06                     | 44.00%                  | 178%                                  | 51%                                       | 118%                                     | 73%                                            | +                                  |
| <b>BGH 2-3</b>     | 1.11±0.02                        | 1.36±0.05                         | 47.43±1.23                    | 16.83±0.45                     | 30.50%                  | 425%                                  | 43%                                       | 111%                                     | 65%                                            | ++                                 |
| <b>G3f</b>         | 1.12±0.05                        | 1.34±0.10                         | 34.59±0.83                    | 16.13±0.66                     | 25.10%                  | 283%                                  | 41%                                       | 113%                                     | 64%                                            | +++                                |
| <b>G2c</b>         | 1.12±0.06                        | 1.22±0.30                         | 26.48±0.95                    | 15.29±2.55                     | 18.50%                  | 193%                                  | 29%                                       | 114%                                     | 57%                                            | +++                                |
| <b>G2b</b>         | 0.94±0.07                        | 1.31±0.02                         | 16.29±1.12                    | 16.25±0.39                     | 26.00%                  | 80%                                   | 37%                                       | 79%                                      | 50%                                            | ++++                               |
| <b>BGH 2-2</b>     | 0.89±0.07                        | 1.26±0.10                         | 18.01±0.85                    | 15.9±0.74                      | 23.30%                  | 99%                                   | 33%                                       | 70%                                      | 44%                                            | ++                                 |
| <b>BGH 1-3</b>     | 0.82±0.06                        | 1.26±0.05                         | 14.23±0.23                    | 16.0±0.43                      | 24.00%                  | 58%                                   | 32%                                       | 56%                                      | 39%                                            | +                                  |
| <b>BGH 2-7</b>     | 0.56±0.03                        | 1.51±0.15                         | 9.43±1.03                     | 19.675±2                       | 52.50%                  | 4%                                    | 59%                                       | 6%                                       | 38%                                            | +                                  |
| <b>G1d</b>         | 0.76±0.07                        | 1.22±0.06                         | 13.5±0.4                      | 15.73±0.76                     | 22.00%                  | 49%                                   | 28%                                       | 44%                                      | 32%                                            | ++++                               |
| <b>G3d</b>         | 0.77±0.12                        | 1.20±0.060                        | 13.33±1.03                    | 15.38±0.77                     | 19.30%                  | 48%                                   | 26%                                       | 47%                                      | 32%                                            | ++                                 |
| <b>BGH 2-5</b>     | 0.74±0.07                        | 1.19±0.04                         | 14.36±0.50                    | 15.28±0.86                     | 18.50%                  | 59%                                   | 25%                                       | 41%                                      | 29%                                            | ++                                 |
| <b>G1a</b>         | 0.50±0.04                        | 1.28±0.07                         | 8.52±0.47                     | 16.60±0.27                     | 28.70%                  | -6%                                   | 34%                                       | -4%                                      | 19%                                            | ++                                 |
| <b>G3c</b>         | 0.50±0.01                        | 1.04±0.05                         | 8.80±0.47                     | 13.77±1.16                     | 6.80%                   | -3%                                   | 10%                                       | -4%                                      | 3%                                             | ++++                               |
| <b>TNT</b>         | 0.52±0.01                        | 0.95±0.13                         | 9.03±0.70                     | 12.91±0.56                     | 0%                      | 0%                                    | 0%                                        | 0%                                       | 0%                                             | +++                                |
| <b>G4a</b>         | 0.61±0.02                        | 0.87±0.18                         | 11.45±0.47                    | 12.60±0.26                     | -2.30%                  | 27%                                   | -8%                                       | 16%                                      | -1%                                            | ++++                               |

<sup>a</sup>The values represent the mean of three independent assay replicates, expressed as the mean ± standard error, with units in grams (g) and millimeters (mm).

<sup>b</sup> Percentages are derived by comparing inoculated versus non-inoculated samples.

<sup>c</sup> The gradation of responses for the trait of root hair development, ranging from strong to weak, is denoted as (+ + + +), (+ + +), (+ +), and (+).

Figure S1.

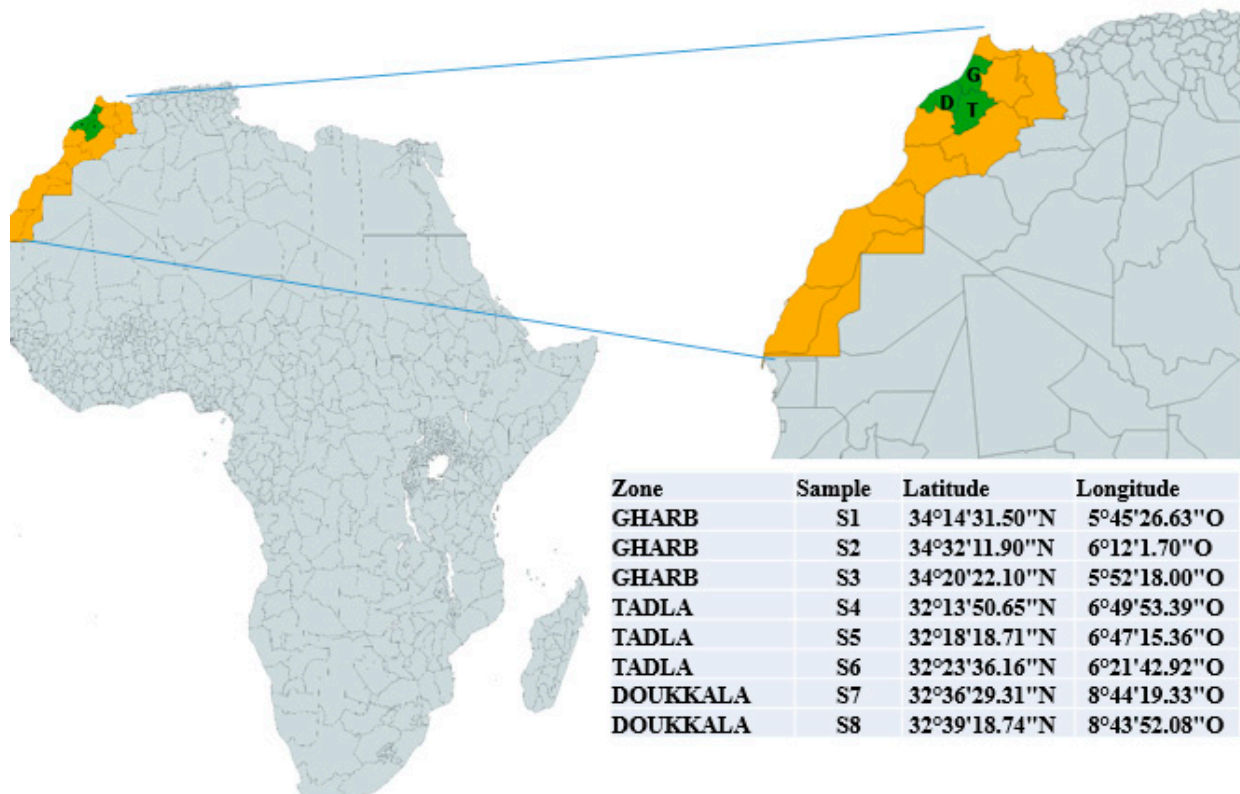

**Figure S1.** A map showing the 6 sites that have been sampled in Morocco in three regions: G, Gharb; D, Doukkala; and T, Tadla.

Figure S2.

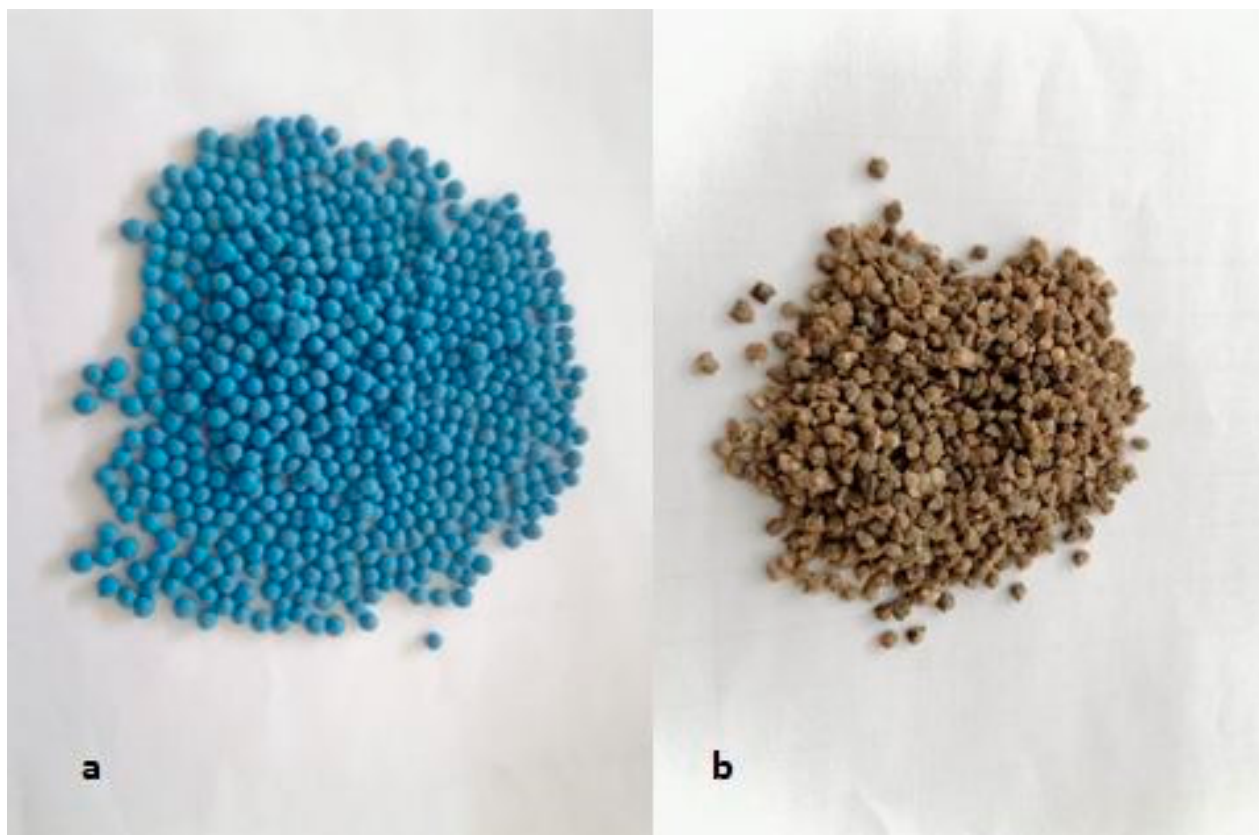

**Figure S2.** Panel a displays seeds of sugar beet with a coating, whereas Panel b illustrates seeds that have been washed to eliminate the coated reagents.

Figure S3.

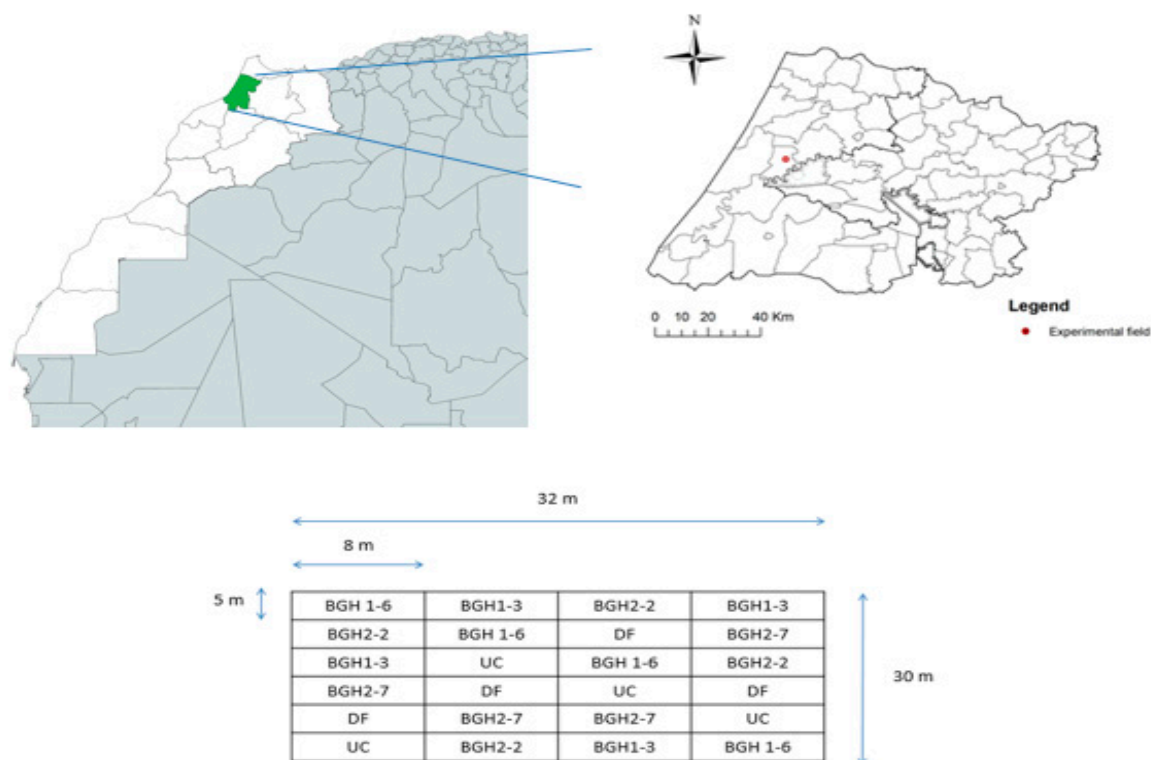

**Figure S3.** The field trial site's location and the experimental setup, including treatments, are shown. The four bacterial isolates (BGH1-6, *Pantoea* sp.; BGH 2-2, *Serratia* sp.; BGH 2-7, *Bacillus* sp.; and BGH 1-3, *Serratia* sp.), along with DF (Difenoconazole) and UC (untreated control), were employed. The experiment included four replicates. The dimensions of the plots are presented in meters.

Figure S4.

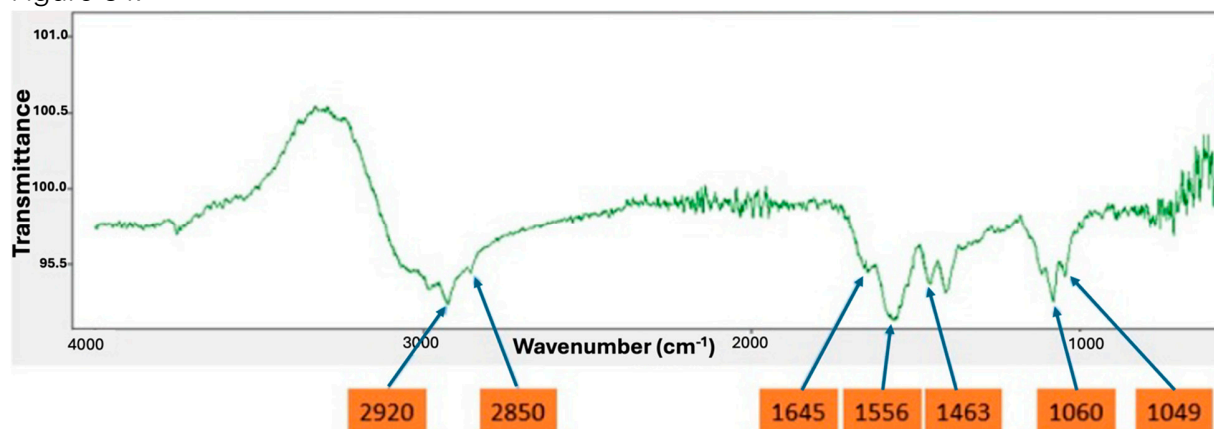

Figure S4. Fourier Transform Infrared (FTIR) Spectroscopy used to perform qualitative and quantitative analysis the bacterial isolate BGH2-2 supernatant.

Biplot (axes F1 et F2 : 42,46 %)

F2 (17,95 %)

F1 (24,52 %)

Variables (rectangles): FENDI, P17-P18, BGH 4-1, lam, HCN, lpr, BGH 1-3, BGH 2-7, IPF (%), ICD (%), lpe, IC, G4a, ITU, BACC, Chi, BGH 2-5, BGH 2-2, G2b, G2c, BGH 1-6, BGH 2-1, G1d, G1b, G1a, G3f, BGH 1-5, BGH 2-3.

Samples (dots): FENDI, P17-P18, BGH 4-1, lam, HCN, lpr, BGH 1-3, BGH 2-7, IPF (%), ICD (%), lpe, IC, G4a, ITU, BACC, Chi, BGH 2-5, BGH 2-2, G2b, G2c, BGH 2-1, G1d, G1b, G1a, G3f, BGH 1-5, BGH 2-3.

8



## References used in Tables S1 and S2

1. Ramarathnam, R.; Bo, S.; Chen, Y.; Fernando, W.G.D.; Xuewen, G.; De Kievit, T. Molecular and biochemical detection of fengycin-and bacillomycin D-producing *Bacillus* spp., antagonistic to fungal pathogens of canola and wheat. *Canadian Journal of Microbiology* **2007**, *53*, 901-911.
2. Dimkić, I.; Živković, S.; Berić, T.; Ivanović, Ž.; Gavrilović, V.; Stanković, S.; Fira, D. Characterization and evaluation of two *Bacillus* strains, SS-12.6 and SS-13.1, as potential agents for the control of phytopathogenic bacteria and fungi. *Biological Control* **2013**, *65*, 312-321.
3. Hsieh, F.C.; Li, M.C.; Lin, T.C.; Kao, S.S. Rapid detection and characterization of surfactin-producing *Bacillus subtilis* and closely related species based on PCR. *Current Microbiology* **2004**, *49*, 186-191, doi:10.1007/s00284-004-4314-7.
4. Syed-Ab-Rahman, S.F.; Carvalhais, L.C.; Chua, E.; Xiao, Y.; Wass, T.J.; Schenk, P.M. Identification of soil bacterial isolates suppressing different phytophthora spp. And promoting plant growth. *Frontiers in Plant Science* **2018**, *871*, doi:10.3389/fpls.2018.01502.
5. Ezrari, S.; Mhidra, O.; Radouane, N.; Tahiri, A.; Polizzi, G.; Lazraq, A.; Lahlali, R. Potential role of rhizobacteria isolated from citrus rhizosphere for biological control of citrus dry root rot. *Plants* **2021**, *10*, 1-26, doi:10.3390/plants10050872.
6. Etesami, H.; Alikhani, H.A.; Mirseyed Hosseini, H. Evaluation of halotolerant endophytic bacteria isolated from the halophyte suaeda for biological control of fungal rice pathogens. **2019**.
7. Dinesh, R.; Anandaraj, M.; Kumar, A.; Bini, Y.K.; Subila, K.P.; Aravind, R. Isolation, characterization, and evaluation of multi-trait plant growth promoting rhizobacteria for their growth promoting and disease suppressing effects on ginger. *Microbiological research* **2015**, *173*, 34-43.
8. Jamilah, I.T.; Meryandini, A.; Rusmana, I.; Suwanto, A.; Mubarik, N.R. Activity of proteolytic and amylolytic enzymes from *Bacillus* spp. isolated from shrimp ponds. *Microbiology Indonesia* **2009**, *3*, 4-4.
9. Pertiwinigrum, A.; Anggraini, F.D.; Fitrianto, N.A. Isolation and identification of bacterial protease enzyme of leather waste. *Journal of the Indonesian Tropical Animal Agriculture* **2017**, *42*.
10. Hsu, S.C.; Lockwood, J.L. Powdered Chitin Agar as a Selective Medium for Enumeration of Actinomycetes in Water and Soil1. *Applied Microbiology* **1975**, *29*, 422-426, doi:10.1128/aem.29.3.422-426.1975.
11. Rodrigues, A.A.; Forzani, M.V.; Soares, R.d.S.; Sibov, S.T.; Vieira, J.D.G. Isolation and selection of plant growth-promoting bacteria associated with sugarcane. *Pesquisa Agropecuária Tropical* **2016**, *46*, 149-158.
12. Lahlali, R.; Aksissou, W.; Lyousfi, N.; Ezrari, S.; Blenzar, A.; Tahiri, A.; Ennahli, S.; Hrustić, J.; MacLean, D.; Amiri, S. Biocontrol activity and putative mechanism of *Bacillus amyloliquefaciens* (SF14 and SP10), *Alcaligenes faecalis* ACBC1, and *Pantoea agglomerans* ACBP1 against brown rot disease of fruit. *Microbial Pathogenesis* **2020**, *139*, 103914-103914, doi:10.1016/j.micpath.2019.103914.
13. Modi, K.; Patel, P.; Parmar, K. Isolation, screening and characterization of PGPR from rhizosphere of rice. *International Journal of Pure & Applied Bioscience* **2017**, *5*, 264-270.
14. Yuttavanichakul, W.; Lawongsa, P.; Wongkaew, S.; Teaumroong, N.; Boonkerd, N.; Nomura, N.; Tittabutr, P. Improvement of peanut rhizobial inoculant by incorporation of plant growth promoting rhizobacteria (PGPR) as biocontrol against the seed borne fungus, *Aspergillus niger*. *Biological Control* **2012**, *63*, 87-97.
